# Supplementary material for: A Floatable and Highly Water-Durable TiO2-Coated Net for Photocatalytic Antibacterial Water Treatment in Developing Countries
Source: MDPI journal article supplement (doi:10.3390/w15020320), 2023-01-12
Supplement: s1 [file s1]

## Support information

TiO<sub>2</sub> particles

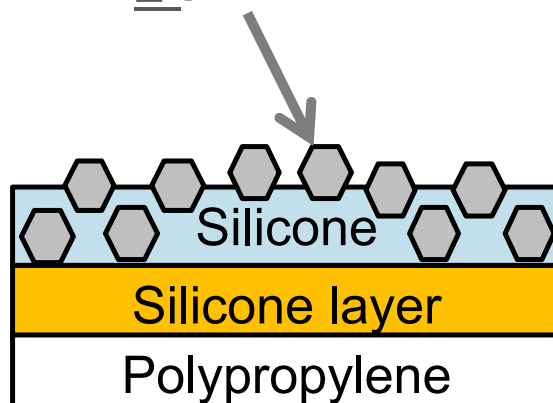

Figure S1. Schematic of the coated layers.

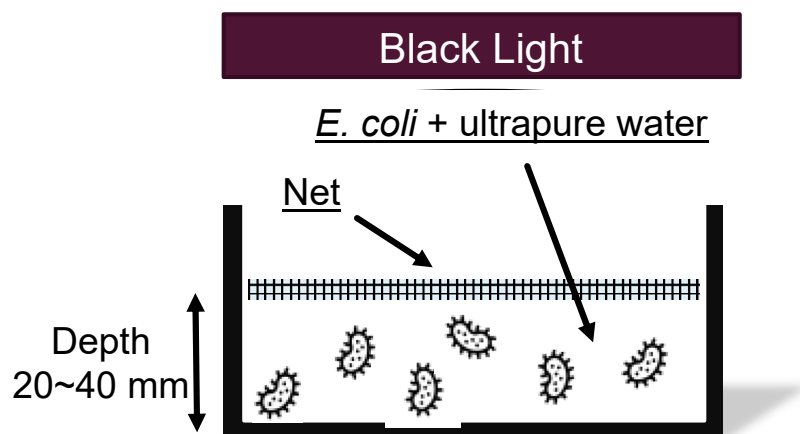

Figure S2. Schematic of the antibacterial test setup.

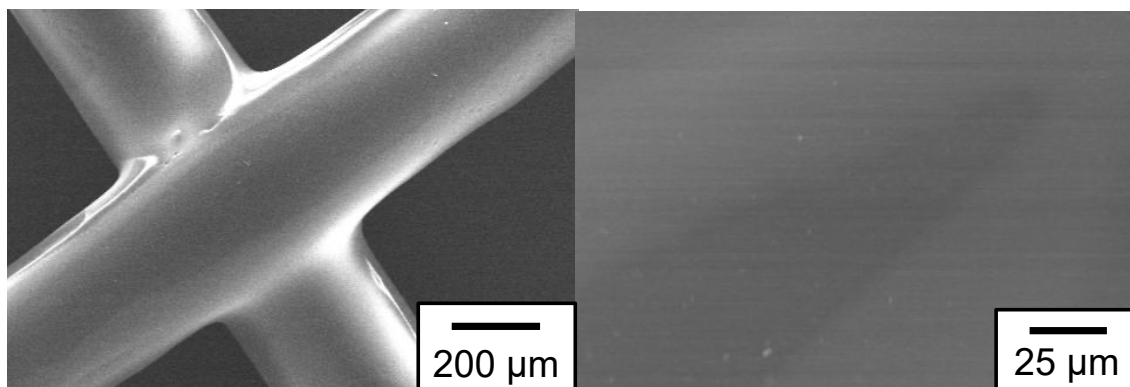

Figure S3. SEM images of the silicone-layer coated polypropylene net at different magnifications.

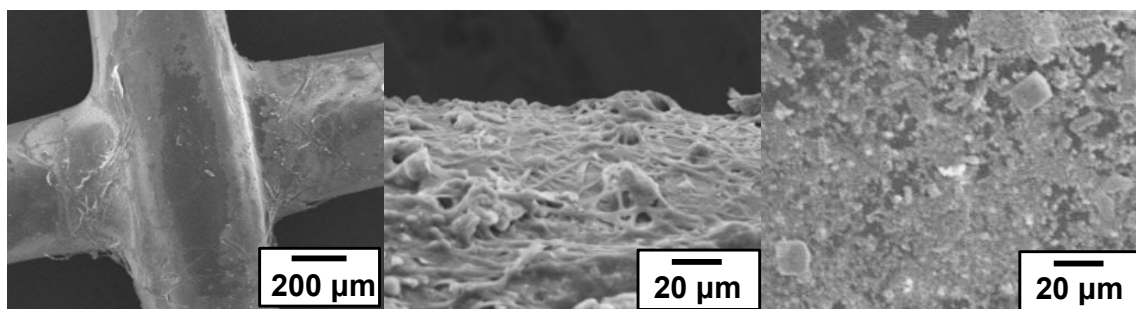

Figure S4. SEM images of algae and diatom growth on the HDTMS-TiO<sub>2</sub> net surface.
